# Supplementary material for: Dark-Induced Effects on Pollen Development and HvGAMYB Expression in Spring Barley (<em>Hordeum vulgare</em> L.) Genotypes with Contrasting Drought Tolerance
Source: Preprints.org preprint supplement (doi:10.20944/preprints202304.0371.v1), 2023-04-17
Supplement: Supplementary file 2 [file Supplementary Figure S2.docx]

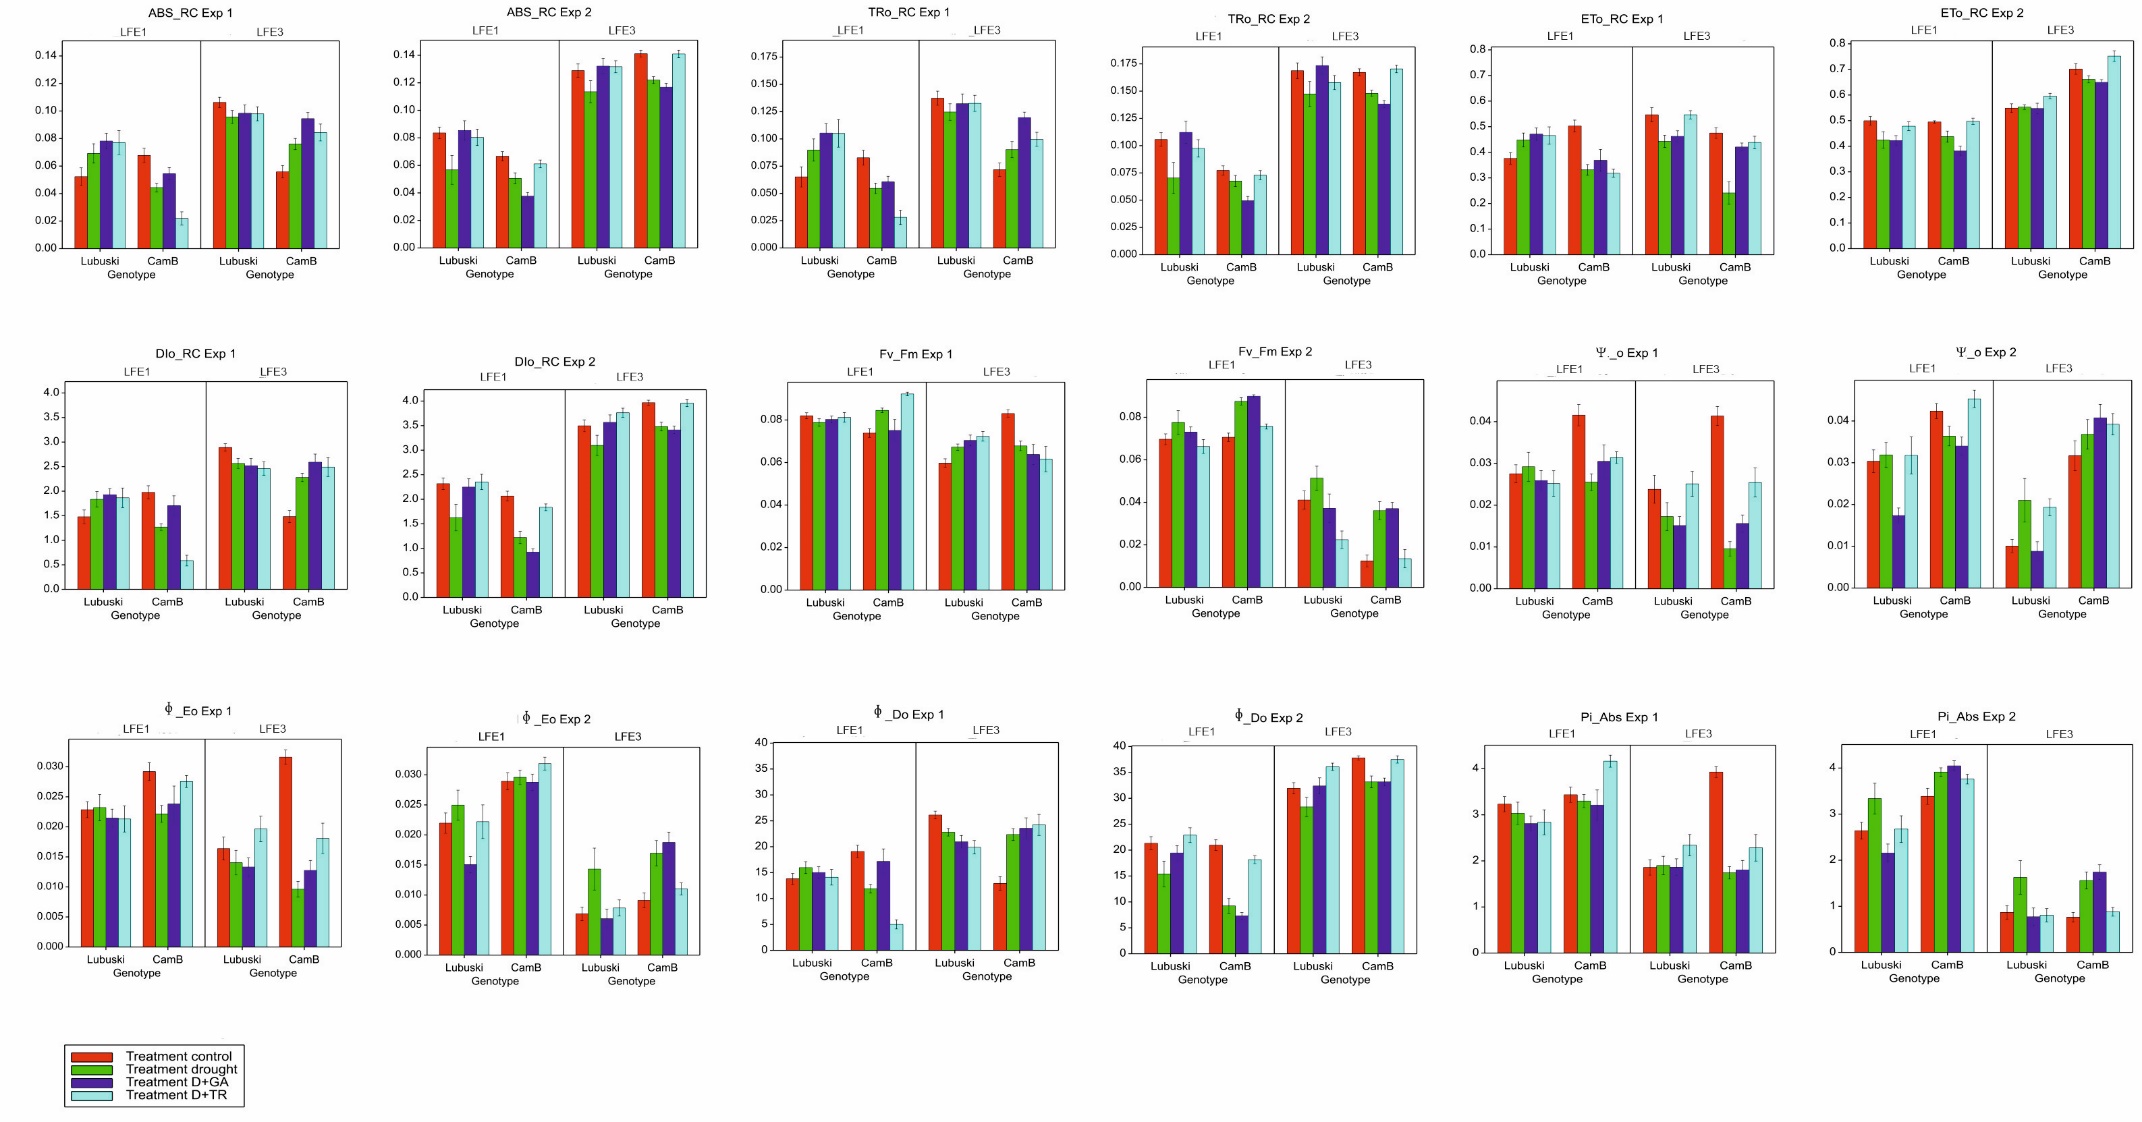


Supplementary Figure S2. Mean values (with standard errors) recorded for chlorophyll fluorescence parameters in both type of experiments at two development points (LFE1 and LFE3.
