# Supplementary material for: Dark-Induced Effects on Pollen Development and HvGAMYB Expression in Spring Barley (<em>Hordeum vulgare</em> L.) Genotypes with Contrasting Drought Tolerance
Source: Preprints.org preprint supplement (doi:10.20944/preprints202304.0371.v1), 2023-04-17
Supplement: Supplementary file 3 [file Supplementary Figure S3.docx]

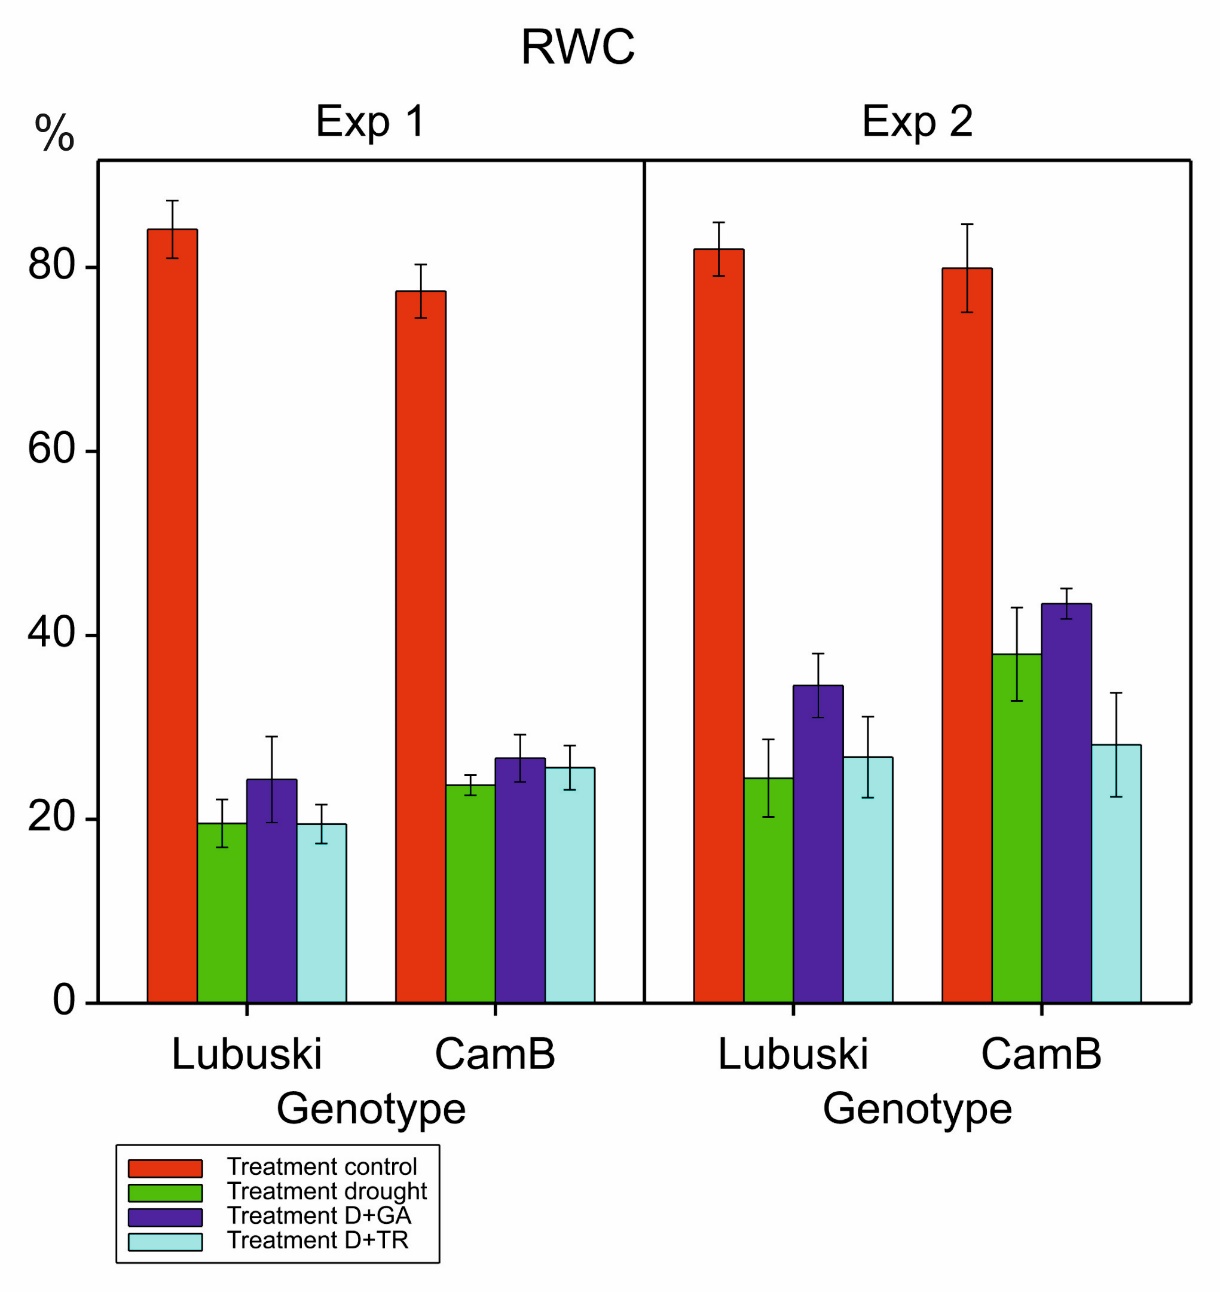


Supplementary Figure S3. Means values (with standard errors) of RWC recorded for two contrasting genotypes in different water regimes in both type of experiments.
