# Supplementary material for: Dark-Induced Effects on Pollen Development and HvGAMYB Expression in Spring Barley (<em>Hordeum vulgare</em> L.) Genotypes with Contrasting Drought Tolerance
Source: Preprints.org preprint supplement (doi:10.20944/preprints202304.0371.v1), 2023-04-17
Supplement: Supplementary file 4 [file Supplementary Figure S4.docx]

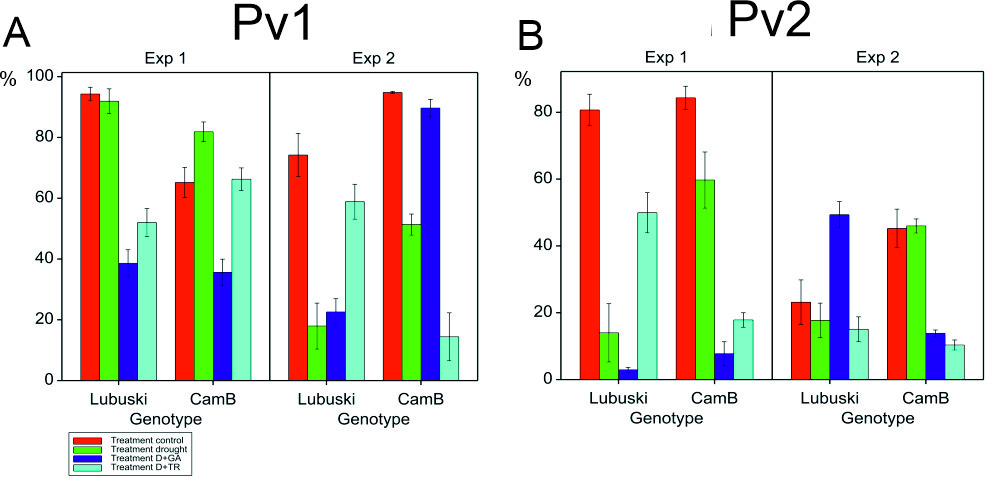


Supplementary Figure S4. Mean values (with standard errors) of pollen viability evaluation traits (two different methods: A – KI/I2 – Pv1; B – TTC - Pv2) recorded for two contrasting genotypes in different water regimes in both type of experiments.
