# Supplementary material for: Dark-Induced Effects on Pollen Development and HvGAMYB Expression in Spring Barley (<em>Hordeum vulgare</em> L.) Genotypes with Contrasting Drought Tolerance
Source: Preprints.org preprint supplement (doi:10.20944/preprints202304.0371.v1), 2023-04-17
Supplement: Supplementary file 5 [file Supplementary Table S1.docx]

Supplementary Table S1. The dates of sample collection for microscopic observation conducted in both experiments (Exp 1 and Exp 2). Treatments: C – control condition; D – drought condition; D+GA - drought condition combined with GA3 application; D+TR - drought condition combined with Trinexapac application. NoD – number of days, the first day is the day of droughts beginning.

| Genotype | Treatment | Exp 1 | Exp 2 |
| --- | --- | --- | --- |
| NoD | NoD |
| CamB | C | 7 | 16 |
| D | 9 | 17 |
| D+GA | 5 | 8 |
| D+TR | 11 | 20 |
|  |  |  |  |
| Lubuski | C | 12 | 24 |
| D | 14 | 25 |
| D+GA | 12 | 19 |
| D+TR | 17 | 27 |
