# Supplementary material for: Dark-Induced Effects on Pollen Development and HvGAMYB Expression in Spring Barley (<em>Hordeum vulgare</em> L.) Genotypes with Contrasting Drought Tolerance
Source: Preprints.org preprint supplement (doi:10.20944/preprints202304.0371.v1), 2023-04-17
Supplement: Supplementary file 6 [file Supplementary Table S2.docx]

Supplementary Table S2. DNA sequences of the gene specific primers.

| Gene | Sequence (5′→3′) | Ampl. length (bp) | Melt temp.  [ºC] | E [%] |
| --- | --- | --- | --- | --- |
| *HvGAMYB* | F: CCTTCACTCCAAGATACCGAAT | 89 | 63 | 108.3 |
| R: GGATCAACCAACTCCGTAGG | 63 |
| *ACT1* | F: GCCGTGCTTTCCCTCTATG | 235 | 63 | 101.8 |
| R: GCTTCTCCTTGATGTCCCTTA | 63 |
| *UBI* | F: TCGCCGTCCTCCAGTTCTAC | 63 | 63 | 105.1 |
| R: CCTTCCTGAGCCTGGTTACCT | 63 |
| *UPL* | F: CTGAAGAGTTAGGCGGGAAA | 100 | 63 | 105.8 |
| R: ATCGCATGAACGTAGTGCAA | 63 |
