# Supplementary figures and images for: Dark-Induced Effects on Pollen Development and HvGAMYB Expression in Spring Barley (<em>Hordeum vulgare</em> L.) Genotypes with Contrasting Drought Tolerance
Source: Preprints.org preprint supplement (doi:10.20944/preprints202304.0371.v1), 2023-04-17

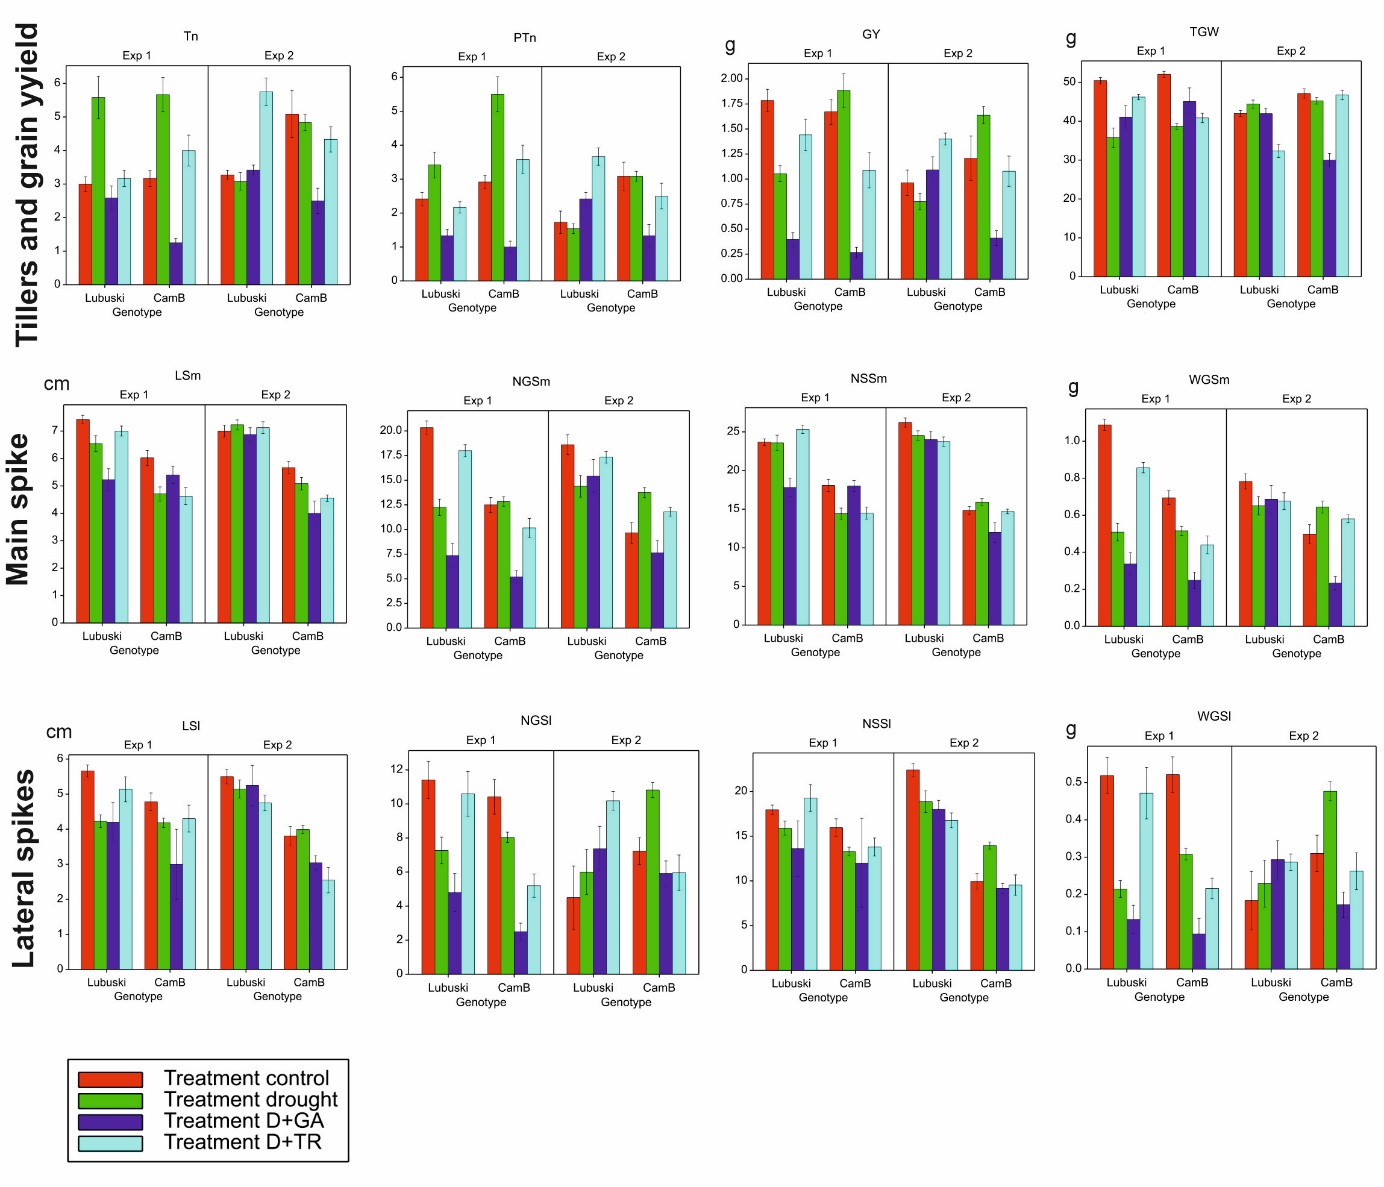


Supplementary Figure S1. Mean values of yield-related traits (with standard errors).

Supplement: Supplementary file 1 [file Supplementary Figure S1.docx]
